# Supplementary material for: Kinetic discrimination of self/non-self RNA by the ATPase activity of RIG-I and MDA5
Source: PubMed Central journal article supplement (PMC4517655; doi:10.1186/s12915-015-0166-9), 2015-07-28
Supplement: 12915_2015_166_MOESM6_ESM.pdf [file 12915_2015_166_MOESM6_ESM.pdf]

Additional file 6

**A**

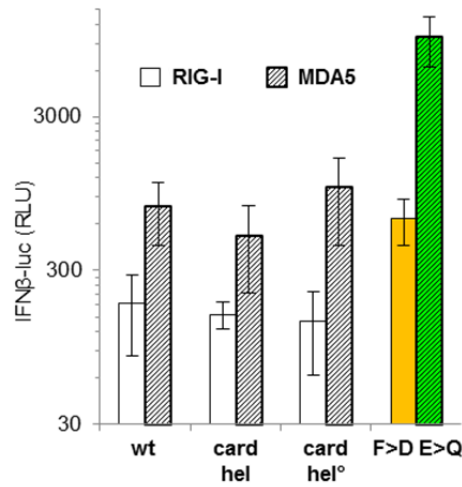

**B**

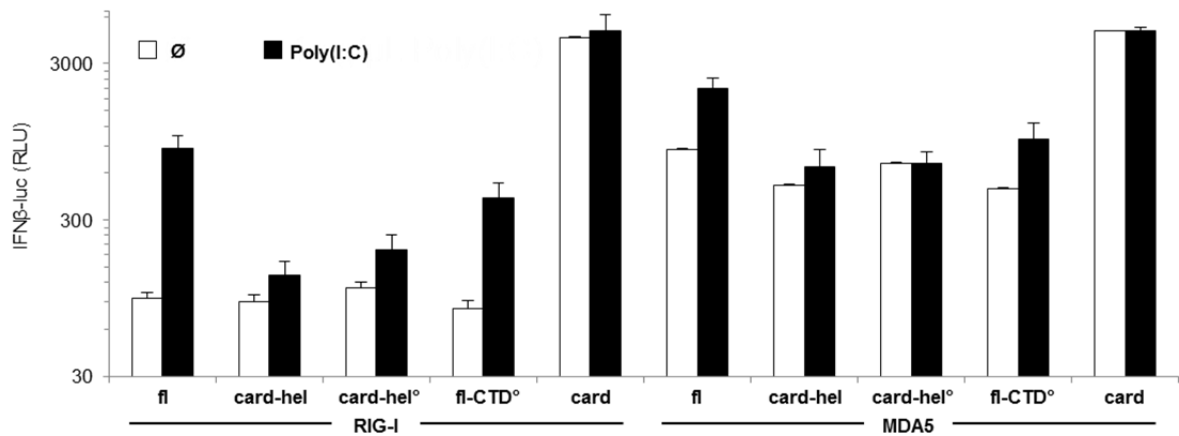

**RIG-I and MDA5 truncated from their CTD domain remain auto-repressed.** *CARD-hel* and *CARD-hel°* constructs from both RIG-I (empty columns) and MDA5 (shaded columns) display only background activity similar to their full-length counterparts and well below the constitutive activity of RIG-I F539D and MDA5 E444Q mutants ( $p < 0.025$  to  $< 0.0125$ , mean & s.d. from 3 independent experiments, each done in independent triplicates) (A) whereas RIG-I CARDS (chimeric RIG-I[1-188]-glu2) and MDA5 CARDS (chimeric MDA5[1-200]-glu2) constructs displays as high signalling activity as MDA5-E444Q mutant (compare B with A). The experiments were done in Huh7.5 cells
