# Supplementary material for: Kinetic discrimination of self/non-self RNA by the ATPase activity of RIG-I and MDA5
Source: PubMed Central journal article supplement (PMC4517655; doi:10.1186/s12915-015-0166-9), 2015-07-28
Supplement: 12915_2015_166_MOESM7_ESM.pdf [file 12915_2015_166_MOESM7_ESM.pdf]

## Additional file 7

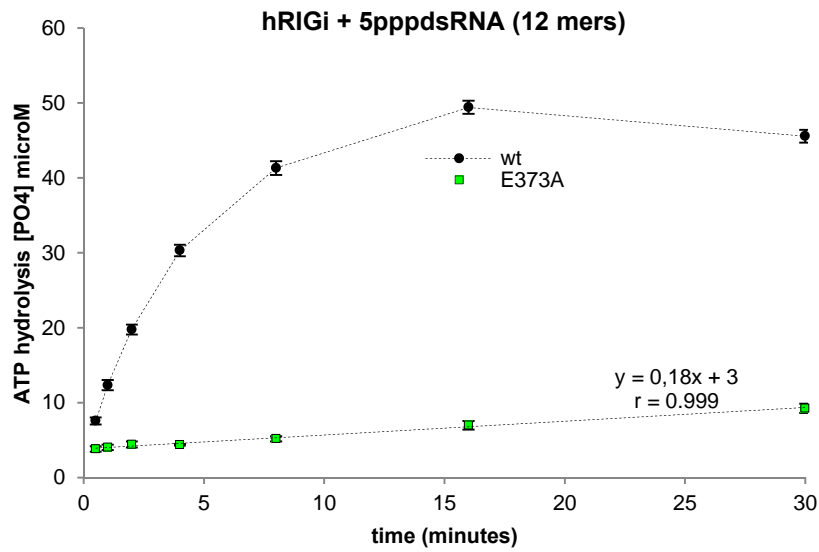

**DECH/DACH mutation in ATPase domain of hRIG-I results in much slower ATP hydrolysis ability.** ATP hydrolysis assay was performed by incubating 0.5  $\mu$ M RIG-I, 2  $\mu$ M 12dsRNA and 2 mM ATP. Note that the ATP hydrolysis rate of hRIG-I E373A and that of dRIG-I E373Q (manuscript, Figure 4) do not significantly differ to each other ( $0.18 \pm 0.035$   $\mu$ M PO<sub>4</sub>/min and  $6.35 \pm 0.12$   $\mu$ M PO<sub>4</sub>/min, respectively,  $p > 0.15$ ) as were the fold reduction compared to their human and duck counterpart ( $35.6 \pm 6.7$  and  $24.9 \pm 3.5$  respectively,  $p > 0.15$ )
