# Supplementary material for: Kinetic discrimination of self/non-self RNA by the ATPase activity of RIG-I and MDA5
Source: BMC Biol. 2015 Jul 28;13:54. doi: 10.1186/s12915-015-0166-9 (PMC4517655; doi:10.1186/s12915-015-0166-9)
Supplement: Additional file 5: — MDA5 T946 and A946 variants exhibit similar functional phenotypes and details of V/MDA5 interactions. (PDF 364 kb) [file 12915_2015_166_MOESM5_ESM.pdf]

## Additional file 5

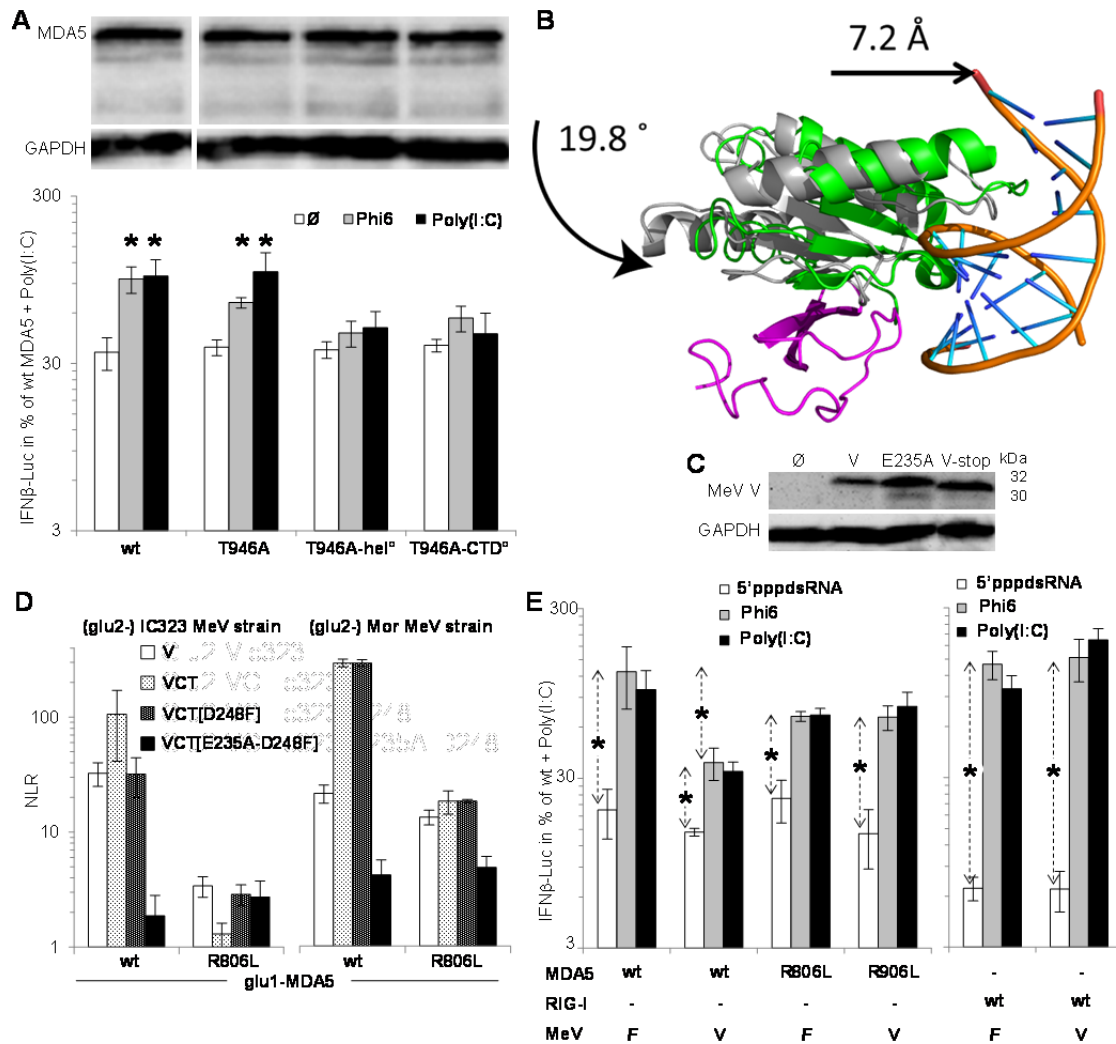

**(A)** MDA5 T946 and A946 variants exhibit similar functional phenotypes in Huh7.5 cells (significance vs w/o RNA at  $p < 0.05$  to  $< 0.0001$  are quoted by a \*, mean & s.d. of three independent experiments with each combination set made in triplicates).

**(B)** Superposition between hel2-V protein of MDA5-V protein (PDB ID 4I1S) (green) and hel2-dsRNA of hMDA5-10dsRNA (PDB ID 4GL2) (grey).

**(C)** Western blot showing the expression of measles virus V protein constructs

**(D)** Ability of MeV V protein to bind to MDA5 as measured by gaussia luciferase based protein complementation assay performed in 293T cells. V proteins from wt IC323 and vaccine Moraten (mor) MeV strains and their C terminal domains (VCT) harbouring or not D248F (STAT2 residue) and E235A (MDA5 residue) were tested for their ability to bind to wt and R806L (V residue) MDA5. Either V D248F substitution or R806L substitution inhibits V-MDA5 interaction (significance versus wt counterparts  $p < 0.05$  to  $< 0.001$ , mean and sd of three independent experiments with each combination set made in triplicates). Measles virus fusion glycoprotein (F) was used as a protein control.

**(E)** MDA5 R806L mutant and RIG-I resists to the inhibitory activity of MeV V protein in Huh7.5 cells. The MeV F protein was used as an unrelated protein control. (significance at  $p < 0.01$  to  $< 0.0005$  are

*quoted by a \*, mean and sd of three independent experiments with each combination set made in triplicates).*
