# Supplementary material for: Kinetic discrimination of self/non-self RNA by the ATPase activity of RIG-I and MDA5
Source: Springer Nature journal article supplement (doi:10.1186/s12915-015-0166-9), 2015-07-27
Supplement: MOESM4 [file 12915_2015_166_MOESM4_ESM.pdf]

Additional file 4

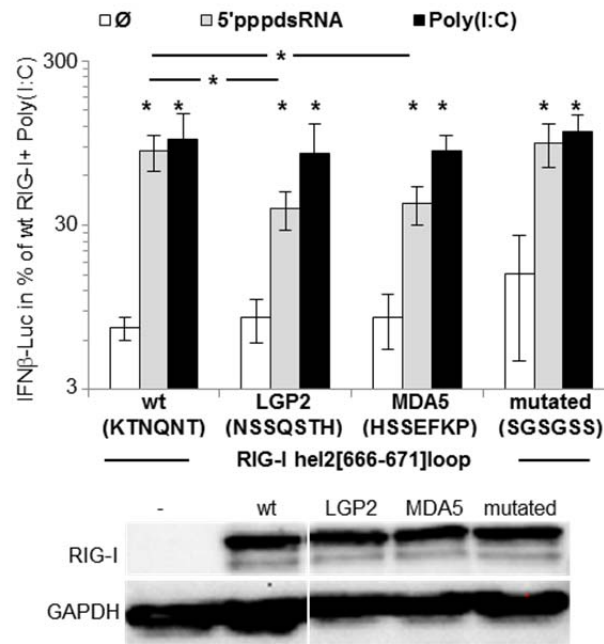

**Figure AF-4.** The RIG-I hel2[666-671] loop seems to favor the recognition of dsRNA with 5'ppp independently of its sequence but possibly to its shorter 6 amino-acid length compared to that of MDA5 and LGP2 in Huh7.5 cells (\* $p < 0.025$  to  $p < 0.005$ , mean & s.d. from 3 independent experiments done in triplicates).
